# Supplementary figures and images for: Spontaneous choices for insect-pollinated flower shapes by wild non-eusocial halictid bees
Source: Oxford University Press journal article supplement (doi:10.1242/jeb.242457), 2021-07-28

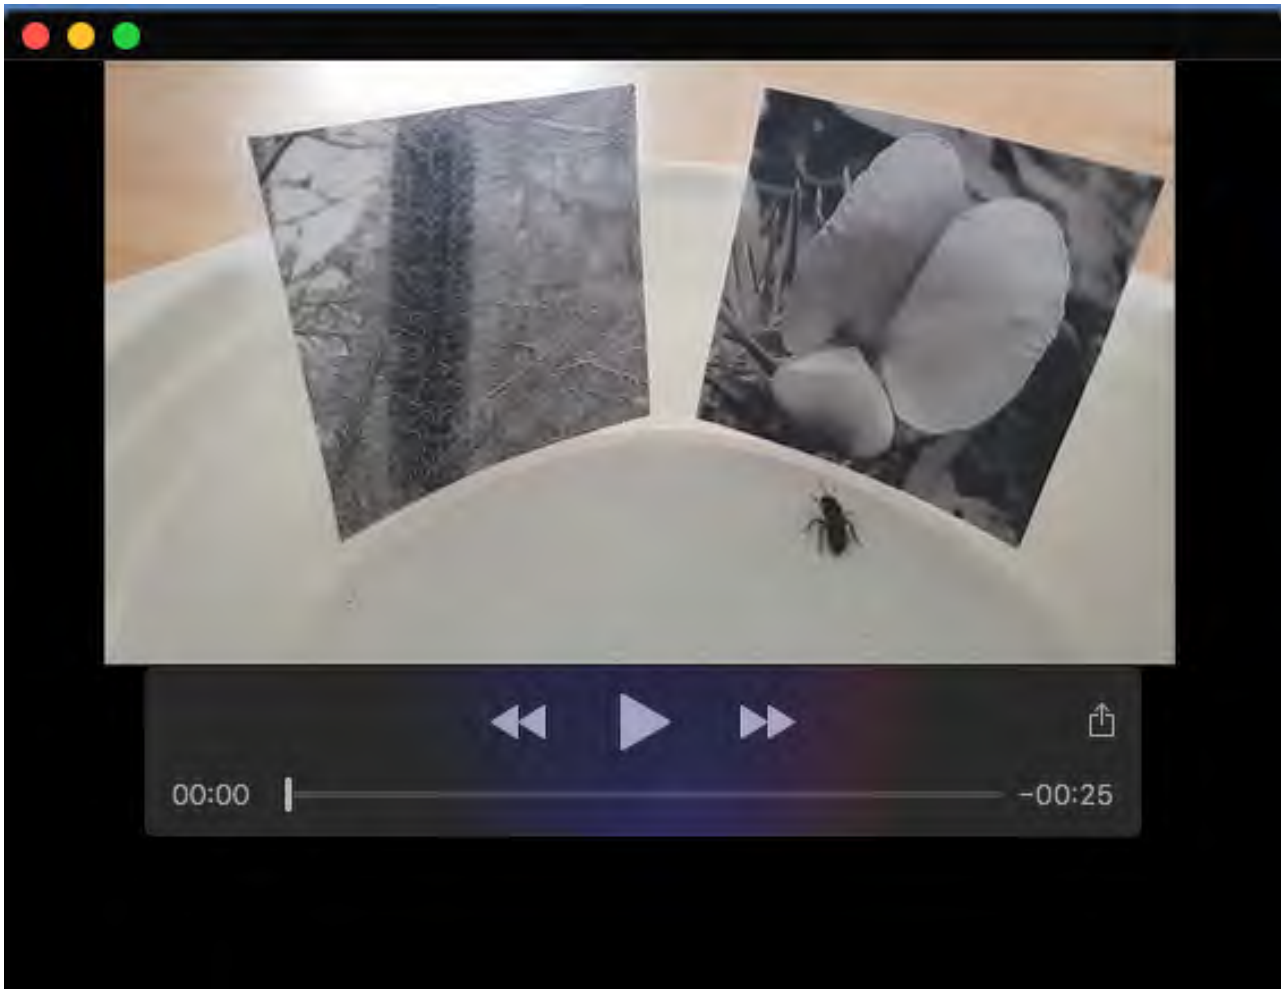

**Movie 1.** *Lasioglossum lanarium* bee performing flower choice experiment.

Supplement: jeb242457supp.pdf [file jeb242457supp.pdf]
